# Supplementary material for: Effects of Interaction of Protein Hydrolysate and Arbuscular Mycorrhizal Fungi Effects on Citrus Growth and Expressions of Stress-Responsive Genes (Aquaporins and SOSs) under Salt Stress
Source: MDPI journal article supplement (doi:10.3390/jof9100983), 2023-09-29
Supplement: s1 [file s1]

**Supplementary Material Table S1.** Specific primer sequences of genes used for qRT-PCR.

| Gene names     | Accession number  | Primer sequences(5'→3')                              |
|----------------|-------------------|------------------------------------------------------|
| <i>Actin</i>   | XM_006464503      | F: CATCCCTCAGCACCTTCC<br>R: CCAACCTTAGCACTTCTCC      |
| <i>CsPIP1</i>  | Cs_ont_5g048130.1 | F: TGGCATGATCTTTGCGCTTG<br>R: ACCATGTAGAAGACAGCCCTTG |
| <i>CsPIP2</i>  | Cs_ont_6g015270.1 | F: TTTTACAGGGCTGGCATTGC<br>R: AAGATCATGCCGCCAAAAGC   |
| <i>CsPIP3</i>  | Cs_ont_6g020260.1 | F: ATTGGGCGCTGAGATCATTG<br>R: TTGACAATGGTGCCAAGACG   |
| <i>CsPIP4</i>  | Cs_ont_6g020270.1 | F: TCGCCACGCTCTTGTTTTTG<br>R: AATGCCAACACCACCACATC   |
| <i>CsPIP5</i>  | Cs_ont_6g020280.1 | F: ATGTGGTGGTGTGTTGGCATTC<br>R: AGAACAGCCCAAATGTCACC |
| <i>CsPIP6</i>  | Cs_ont_7g001120.1 | F: TCTTCGTGCTCGTTTACTGC<br>R: AGAAAAGTGCACGTGTCAGC   |
| <i>CsPIP7</i>  | Cs_ont_7g001130.1 | F: GCCGAGTTCATAGCCACTTTTC<br>R: AAACGAGCGCGAAGATCATG |
| <i>CsPIP8</i>  | Cs_ont_7g006190.1 | F: TTGGCCACAATCCCAATCAC<br>R: TGGTAGAAAGCCGCAATTGC   |
| <i>CsPIP9</i>  | Cs_ont_8g004900.1 | F: TGGGTTTGCTGTGTTTCATGG<br>R: TCATCCCAGGCTTTCTCCTTG |
| <i>CsPIP10</i> | Cs_ont_8g028000.1 | F: TATTGCATGGGCCTTTGGTG<br>R: TTGCCAAGAACAGCCCAAAC   |
| <i>CsTIP1</i>  | Cs_ont_1g017160.1 | F: TTTGTGCTGTTGCAGTTGG<br>R: AAGATGCCAGTGAGGATGGTG   |
| <i>CsTIP2</i>  | Cs_ont_4g004270.1 | F: TGGCTCATGCTTTTGTGGTG<br>R: GTGATGTGGCCACCGAAAAG   |
| <i>CsTIP3</i>  | Cs_ont_5g016210.1 | F: TGTGCGCGCAGAATTTAC<br>R: AATGCCAGTGGAACCCAAC      |
| <i>CsTIP4</i>  | Cs_ont_5g027860.1 | F: ATGCACACACCAACAACAG<br>R: AAAGCTGCTTCTGCTTCTGC    |
| <i>CsTIP5</i>  | Cs_ont_5g042380.1 | F: TCGCCACGCTTCTTTTGTG<br>R: GCAACACCAACAAACAGTGC    |
| <i>CsTIP6</i>  | Cs_ont_6g022100.1 | F: TTTGTCTTTGCCGGTGAAGG<br>R: AGCAACGAAAAGGGCGAAAG   |
| <i>CsTIP7</i>  | Cs_ont_7g004240.1 | F: TTGGAAACATCGGCATTTCG<br>R: TTTGGATCCACTGCTGTTGC   |
| <i>CsTIP8</i>  | Cs_ont_8g003390.1 | F: ATGCATTTGCCCTCTTCGTG<br>R: AATGTAATGTGGCCGCCAAC   |
| <i>CsTIP9</i>  | Cs_ont_9g023550.1 | F: TTGGCAATTGGGATGATGGC<br>R: TTGAACTTCCGGCAACCAC    |
| <i>CsSOS1</i>  | Cs_ont_2g014530.1 | F: ACAAGGCAAGGCAACAGAAG<br>R: AACGCCTTTGAACGTCAACC   |

|               |                   |                                                     |
|---------------|-------------------|-----------------------------------------------------|
| <i>CsSOS2</i> | Cs_ont_4g006040.1 | F: TTTGGCAAGCCGAACAAAGG<br>R: TGACAATGAGCAACCGCATC  |
| <i>CsSOS3</i> | Cs_ont_5g031770.1 | F: TGACCCAGAAGAGTGGAAGAG<br>R: AAAGCTGGGAAATGCCAAGG |

---
